# **Title: Clinical Applications and Limitations of Large Language Models in Nephrology: A Systematic Review**

Authors:

Zoe Unger<sup>1</sup>, Shelly Soffer<sup>2,3</sup>, Orly Efros<sup>3,4</sup>, Lili Chan<sup>5,6,7</sup>, Eyal Klang<sup>5,6</sup>, Girish N Nadkarni<sup>5,6,7</sup>

<sup>1</sup> First Faculty of Medicine, Charles University, Prague, Czech Republic.

<sup>2</sup> Institute of Hematology, Davidoff Cancer Center, Rabin Medical Center, Petah-Tikva, Israel.

<sup>3</sup> School of Medicine, Tel Aviv University, Tel Aviv, Israel.

<sup>4</sup> National Hemophilia Center and Thrombosis Institute, Sheba Medical Center, Ramat Gan, Israel.

<sup>5</sup> The Division of Data-Driven and Digital Medicine (D3M), Icahn School of Medicine at Mount Sinai, New York, New York, USA.

<sup>6</sup> The Charles Bronfman Institute of Personalized Medicine, Icahn School of Medicine at Mount Sinai, New York, New York, USA.

<sup>7</sup> The Barbara T Murphy Division of Nephrology, Icahn School of Medicine at Mount Sinai, New York, New York

## **Abstract:**

### **Background:**

Large Language Models (LLMs) are emerging as promising tools in healthcare. This systematic review examines LLMs' potential applications in nephrology, highlighting their benefits and limitations.

### **Methods:**

We conducted a literature search in PubMed and Web of Science, selecting studies based on Preferred Reporting Items for Systematic Reviews and Meta-Analyses (PRISMA) guidelines. The review focuses on the latest advancements of LLMs in nephrology from 2020 to 2024. PROSPERO registration number: CRD42024550169.

### **Results:**

Fourteen studies met the inclusion criteria and were categorized into five key areas of nephrology: Streamlining workflow, disease prediction and prognosis, laboratory data interpretation and management, renal dietary management, and patient education. LLMs showed high performance in various clinical tasks, including managing continuous renal replacement therapy (CRRT) alarms (GPT-4 accuracy 90-94%) for reducing intensive care unit (ICU) alarm fatigue, and predicting chronic kidney diseases (CKD) progression (improved positive predictive value from 6.7% to 20.9%). In patient education, GPT-4 excelled at simplifying medical information by reducing readability complexity, and accurately translating kidney transplant resources. Gemini provided the most accurate responses to frequently asked questions (FAQs) about CKD.

**Conclusions:**

While the incorporation of LLMs in nephrology shows promise across various levels of patient care, their broad implementation is still premature. Further research is required to validate these tools in terms of accuracy, rare and critical conditions, and real-world performance.

## **Introduction:**

Large language models (LLMs), such as ChatGPT<sup>1</sup>, are advanced AI models designed to generate human-like text<sup>2</sup>. These models have already shown potential across various medical specialties<sup>3-11</sup>. The complex nature of kidney diseases and their treatment may enable LLM technology to improve clinical management.

Multimodal LLMs allow for effective interpretation of complex data, including visual data through imaging<sup>12</sup>. They are also capable of tailoring treatments by accessing evidence-based scientific literature<sup>13</sup>. Furthermore, LLMs can possibly automate routine tasks, such as documenting medical records, analyzing laboratory tests, and reviewing different imaging modalities<sup>14-16</sup>. This automation may allow doctors to focus more on providing patient-centered care, ultimately leading to better outcomes in nephrology practice.

In this review, we aim to show diverse clinical applications of LLM in the field of nephrology. Our review outlines the capabilities and limitations of LLM in kidney disease management.

## **Overview of AI modalities (Figure 2):**

*Artificial Intelligence (AI)* aims to train a computer to perform tasks usually requiring human cognition.

AI is a general term referring to a broad range of models<sup>17</sup>.

*Natural Language Processing (NLP)* is an important domain within AI, offering various functions related to human language. NLP allows for human language understanding, such as human-like interactions between the user and the chatbot, text generation and processing, and many other functions<sup>18</sup>.

*Deep Learning (DL)* is an advanced type of AI. Within NLP it is used to facilitate its complex linguistic functions. The underlying DL architecture is inspired by the function of biological neurons. It is based on artificial neural networks arranged in multiple layers (hence “deep”). Data processing is handled by

interconnected nodes representing neurons, where each "neuron" is similar to a single logistic regression unit<sup>19</sup>.

When the user presents the chatbot with a textual input (termed prompt), the text then passes through several layers of interconnected nodes, each layer allowing the algorithm additional understanding of the text. An *attention mechanism* is used, detecting individual importance of words within a sentence<sup>20</sup>. This ultimately allows the machine to understand the written text in a contextual manner, and therefore, more accurately.

*Transformers* are a specific type of multi-layered neural network used in DL, characterized by their use of attention mechanisms. A major advancement in transformers occurred with the release of *Bidirectional Encoder Representations from Transformers (BERT)*<sup>21</sup>. BERT improved the application of transformer architecture and achieved state-of-the-art results in various NLP tasks. The improvement offered by BERT was due to several factors, including its bidirectional text processing ability, its pre-training and fine-tuning processes, and its effective adaptability to new tasks.

*Large Language Models (LLMs)* represent a significant development in the field of transformers and the expansion of NLP's capabilities. LLMs enable complex language generation skills, as seen in well-known chatbots such as openAI's Chat Generative Pre-Trained Transformer (ChatGPT)<sup>1</sup> and Google's Gemini<sup>22</sup>. These platforms allow users to pose prompts, and receive written, coherent, and contextual answers generated by AI. When the prompt is more descriptive, the generated answer becomes more accurate. Language generation by LLMs is based on predicting the most probable sequence of words, one by one. LLMs are trained on very large databases and then fine-tuned via reinforcement learning—a process of improving the tool's performance through its own experience. The powerful text analysis capabilities offered by LLMs can be widely used across numerous professions, potentially alleviating the burden of intricate data processing and information retrieval, thus enabling a more effective workflow.

OpenAI offers both free and paid versions of ChatGPT, with the free version utilizing GPT-3.5 and the paid version powered by the more advanced GPT-4. In this paper, ChatGPT will refer to the GPT-3.5

version, while GPT-4 will denote the paid, more advanced model to maintain clarity between the two versions.

As AI continues to evolve, its applications in various medical fields are becoming increasingly prominent<sup>3-11</sup>. This systematic review aims to explore how the diverse functions of LLMs can be leveraged to enhance clinical care within the field of nephrology.

## **Methods:**

### *Search strategy*

This systematic review followed the Preferred Reporting Items for Systematic Reviews and Meta-Analyses (PRISMA) guidelines (**Figure 3**).

We conducted a literature search in MEDLINE/PubMed and Web of Science databases on July 21<sup>st</sup>, 2024. The keywords used for the search were related to two main subjects: “Nephrology” and “LLM”. The full strategy search for each database is detailed in **Supplementary Material 1**.

Studies were included in this systematic review if they addressed the clinical applications of LLMs within the field of nephrology. To meet the inclusion criteria, studies had to be peer-reviewed original research articles published in English and directly relevant to the integration of LLMs in nephrology practice, including aspects such as patient care, diagnostic processes, treatment efficacy, and clinical outcomes.

Exclusion criteria were applied to ensure the relevance and quality of the review. Non-original articles, including reviews, editorials, and commentaries, were excluded. Studies that focused on areas outside of nephrology, such as urology, renal oncology, clinical pharmacology, and laboratory medicine instrumentation, were omitted. Additionally, research concentrating on LLM optimization techniques, engineering applications, or technological advancements without a clear connection to patient care or clinical outcomes in nephrology was excluded. Articles evaluating AI tools in non-clinical settings—such

as professional certification assessments, literature search assistance, scientific writing support, or exam question responses—did not meet the inclusion criteria. Furthermore, studies exploring non-LLM artificial intelligence applications or those showcasing visual data processing tasks performed by LLMs were excluded.

This systematic review is registered in PROSPERO: CRD42024550169.

### *Study selection*

Two reviewers (ZU and SS) independently screened the titles and abstracts to decide whether the results met the inclusion criteria. A further review of the full-text article took place in case of uncertainty. A third reviewer (EK) aided in solving any disagreements in the study selection process.

### *Data extraction*

Data was collected using a standardized data extraction sheet. The information gathered included the year of publication, study design, study location, ethical statement, number of patients, inclusion and exclusion criteria, description of the population, use of an online database, size of the online database, use of an independent test dataset, clinical application, evaluation metrics, and performance results.

### *Quality assessment and risk of bias*

To check for bias and quality assessment, we used the adapted version of Quality Assessment of Diagnostic Accuracy Studies (QUADAS-2) criteria.

## **Results:**

### *Study selection and classification process*

Our literature search identified a total of 556 papers. Of these, 14 studies met our inclusion criteria **Figure 3**. We categorized the eligible studies into five distinct nephrology practice clinical applications:

Streamlining workflow, disease prediction and prognosis, laboratory data interpretation and management, renal dietary management, and patient education, as outlined in **Table 1**.

The characteristics of each included article are presented in **Table 2**. Furthermore, a thorough comparison of the advantages and limitations of the discussed LLM modalities is in **Table 3**.

### *Quality assessment*

To assess the quality and risk of bias, we employed the adapted version of the Quality Assessment of Diagnostic Accuracy Studies (QUADAS-2) criteria across the 14 studies. Overall, all studies exhibited a moderate to high risk of bias concerning the index test, predominantly due to the absence of external validation and ambiguity surrounding the independence of results interpretation relative to the reference standard. Notably, two studies were classified as having a high risk of bias in at least one domain. The data management domain also revealed a moderate risk of bias in most studies, primarily due to incomplete or poorly specified data management processes and a lack of clear procedures to ensure data integrity. The detailed quality assessment is available in **Supplementary Material 2**.

### *Descriptive summary of the results according to the five clinical applications*

#### Streamlining workflow

Four papers were classified under this category, each addressing distinct aspects of clinical work performed by nephrologists<sup>23-26</sup>

Sheikh MS et al.<sup>23</sup> demonstrated high accuracy of GPT-4 (90-94%) in managing continuous renal replacement therapy (CRRT) alarms, surpassing the performance of ChatGPT (84-86%) although the difference was not statistically significant. As the chosen CRRT questions reflect real-life frequently

encountered ICU scenarios, the study illustrates LLMs' potential to reduce ICU alarm fatigue and improve patient safety.

Miao J et al.<sup>24</sup> provided a descriptive application of GPT-4 in addressing inquiries from practicing nephrologists, using nephrogenic diabetes insipidus (DI) diagnosis as a case study. They employed techniques such as Chain of Thought (CoT) prompt engineering, which guides the model to break down reasoning step-by-step<sup>27</sup>, and Retrieval-Augmented Generation (RAG), which integrates external data sources into the model's responses<sup>28</sup>. The authors found that these methods enhance diagnostic specificity and alignment with the *kidney disease: Improving Global Outcomes (KDIGO)* guidelines.

#### Disease prediction and prognosis

Two studies presented LLM tools for different prediction tasks related to nephrology conditions<sup>29,30</sup>

Zisser M et al.<sup>29</sup> introduced the STRAFE transformer, which outperformed other models in predicting progression to stage 5 chronic kidney disease (CKD) and significantly improving the identification of high-risk patients. STRAFE's ability to utilize real-world censored data (of patients with limited observation time, who have not yet encountered the event of interest) allows a more accurate time-to-event prediction.

Mao CS et al.<sup>30</sup> presented AKI-BERT for the early prediction of acute kidney injury (AKI) based on clinical notes. AKI-BERT achieved higher accuracy (AUC 0.720-0.764) compared to general BERT models, emphasizing the importance of specialized training in handling unstructured medical text.

Both models require a complex training process and further adaptations for generalizability to other tasks.

#### Laboratory data interpretation and management

Two papers explored the integration of LLMs in the laboratory aspect of nephrology<sup>15,31</sup>

Kaftan AN et al.<sup>15</sup> compared the performance of three LLMs in interpreting ten simulated sets of laboratory values, and found that the Copilot model demonstrated the highest accuracy. Copilot's



performance had statistically significant difference from ChatGPT's (p=0.002 for all lab results, 0.001 for kidney functions) and Gemini's (p=0.008 for all lab results, 0.005 for kidney functions). It is noteworthy that the newer GPT-4 model was not evaluated, and only ten cases were analyzed. Despite the high performance of Copilot, it relies on input quality and bases its responses on online resources, which are not necessarily tailored for professional medical use.

Berger M et al.<sup>31</sup> introduced a differential transformer for sodium monitoring during a simulated CRRT setup, utilizing a noninvasive and contactless architecture. The test duration was limited to six hours, during which electrolytes were intentionally varied to assess performance in pathological states as well, which are commonly encountered in patients requiring CRRT.

The transformer demonstrated high sensitivity to sodium concentration changes (192 mV/mol/L) and greater precision in repeated measurements (0.3 mmol/L) compared to standard blood gas analyzer (BGA), which has a precision of 0.6 mmol/L. While the absolute accuracy was 4 mmol/L, lower than the BGA's 2 mmol/L, this was still considered sufficient for continuous sodium monitoring. Further evaluation of this tool in real-world clinical settings is needed.

### Renal dietary management

The renal diet, an essential part of care for patients with kidney disease, was addressed by one study<sup>32</sup>

Qarajeh A et al. evaluated the ability of four different LLMs to classify food based on their potassium and phosphorous content. GPT-4 and Bing Chat excelled in potassium content classification, achieving an accuracy of 81%, while Bard AI showed 100% accuracy in determining phosphorus content.

### Patient education

The abilities of LLMs to answer patient inquiries and concerns were showcased in five papers<sup>33-37</sup>

Garcia Valencia OA et al.<sup>33,34</sup> contributed two significant studies to this group, both promoting inclusivity and equity in renal healthcare. The first paper<sup>33</sup> assessed the simplification abilities of ChatGPT and GPT-4 for 27 frequently asked questions (FAQs) and answers on kidney donation. Two independent attempts

were conducted in new chat sessions. GPT-4 significantly reduced the average reading grade level from the original reference of  $9.6 \pm 1.9$  (roughly 10<sup>th</sup> grade) to  $4.30 \pm 1.71$  (4<sup>th</sup> grade), while ChatGPT reduced it to  $7.72 \pm 1.85$  (about 8<sup>th</sup> grade). The goal was to simplify the text to below an 8<sup>th</sup>-grade reading level. GPT-4 achieved this in 96.30% of cases, while ChatGPT succeeded in 59.26% of cases, indicating that the free version of ChatGPT provides more limited access to high-quality, simplified information. The second paper by this author<sup>34</sup>, evaluated the translation abilities from English to Spanish of 54 FAQs on kidney transplant. Two Spanish-speaking nephrologists scored the translations and found high levels of linguistic accuracy (ChatGPT:  $4.89 \pm 0.31$ , GPT-4:  $4.94 \pm 0.23$ ) and cultural sensitivity for Hispanics ( $4.96 \pm 0.19$  for both models) in both ChatGPT and GPT-4. As opposed to the previous paper, there was no significant difference between the performance of the paid and free versions of ChatGPT (linguistic accuracy:  $p=0.26$ , cultural sensitivity:  $p=1.00$ ).

Lee J et al.<sup>35</sup> also evaluated 86 questions on kidney transplant, selected from a pool of real questions asked on Reddit. In this research, the rating of information quality and empathy was done by 565 participants in an online survey. While the study did not explicitly exclude medical professionals as raters, the primary aim was to capture individual perceptions of ChatGPT-generated responses, reflecting how they might be received by patients. The study found that higher education levels among non-White individuals predicted higher-perceived quality ( $M = 6.03$ ,  $SE = 0.39$ ), whereas higher education among White individuals led to lower perceived quality ( $M = 5.85$ ,  $SE = 0.39$ ).

Similarly, Naz R et al.<sup>36</sup> researched the accuracy and quality of information provided by three LLMs, when asked 40 FAQs on a different topic- parents' concerns about CKD. Two independent pediatric nephrologists classified the generated responses with respect to the KDIGO guidelines as a reference. ChatGPT and Gemini showed high accuracy in diagnosis and CKD lifestyle questions. Among the models evaluated, Gemini was noted as the most accurate in providing information on CKD, with an average Global Quality Score (GQS) of  $3.46 \pm 0.55$ .

## **Discussion:**

In this systematic review we explored the use of various LLMs such as ChatGPT in nephrology. We focused on five key aspects of patient care emphasizing their potential to enhance both physician workflows and patient engagement. However, the tested modalities present several limitations, including dependence on input quality, and the necessity for further validation in diverse clinical settings.

### *Applications from Physicians' Perspective*

LLMs, such as GPT-4, have demonstrated significant potential in improving workflow efficiency in nephrology, particularly in ICU settings. However, several of these tools, including their application in continuous renal replacement therapy (CRRT) management, lack extensive external validation and have not been prospectively tested in real-world clinical environments<sup>23,31</sup>. Additionally, LLMs support diagnostic processes by enhancing diagnostic specificity and ensuring alignment with established guidelines like KDIGO, thereby improving clinical decision-making and patient outcomes<sup>24</sup>. To mitigate issues such as hallucinations and outdated information, Retrieval-Augmented Generation (RAG) has been integrated to pull from external data sources, ensuring that LLMs provide up-to-date, guideline-adherent recommendations<sup>24,28</sup>. However, constant verification is required, and ethical issues related to cloud-based patient data processing and security pose significant barriers to widespread implementation.

LLMs also contribute to disease prediction by accurately forecasting CKD progression and AKI, facilitating early interventions. Models like STRAFE and AKI-BERT leverage unstructured clinical data to identify high-risk patients, enhancing personalized patient management. In laboratory data interpretation, LLMs improve the accuracy of renal function test analyses.

While these developments show promise, the ability of tools like ChatGPT to simulate a physician's thought process remains limited. Although LLM reasoning mimics a physician's diagnostic approach by breaking the reasoning process into steps, these models still require further validation before being fully

integrated into clinical practice<sup>24,27</sup>. For instance, Kaftan AN et al. showcased Copilot's accuracy in interpreting ten sets of laboratory values; however, its reliance on online resources and its inability to manage complex medical data suggest that further empirical validation in real-world settings is needed<sup>15</sup>. Moreover, despite their potential, the generalizability of these models remains restricted, necessitating further validation before widespread adoption in nephrology practice.

### *Applications from Patients' Perspective*

The incorporation of LLMs into nephrology practice holds the potential for bridging gaps in patient education and improving accessibility to medical information. For example, models such as GPT-4, can simplify complex medical concepts, provide culturally sensitive translations, and accurately respond to frequently asked questions, even when inquiries contain misspellings or are incomplete.<sup>33,34,37</sup> The studies reviewed focused on patient inquiries based on real online sources, that patients may encounter when exploring a nephrology subject online. These studies underscore the potential for AI tools to improve the accessibility of health-related content across different literacy levels and languages, promoting inclusivity and health equity<sup>33,34</sup>. However, a significant disparity remains between the free and paid versions of ChatGPT, with GPT-4 (the paid version) consistently outperforming the free version in medical information simplification tasks<sup>33</sup>. This performance gap, while showcasing the advancements in AI, also raises concerns about accessibility, as better-quality health information is currently limited to those who can afford paid access, highlighting an inherent health inequity.

While LLMs enhance accessibility, they may oversimplify information, potentially omitting critical details necessary for comprehensive patient understanding<sup>38</sup>. Furthermore, as Lee J et al. noted, while tailoring AI-generated responses based on education level and race has the potential to improve effectiveness, patient perception of these responses can still vary, suggesting that LLM-generated information may not always be equally accessible or comprehensible to all patients<sup>35</sup>. Lastly, the lack of human interaction in LLMs limits their ability to provide empathetic, personalized care, a crucial aspect

of effective doctor-patient communication<sup>37</sup>. This limitation raises ethical concerns about their integration into clinical settings.

### *Limitations*

Our systematic review focused on five areas of possible clinical applications of LLMs in nephrology, specifically excluding non-clinical applications. Some of the papers retrieved relied on a relatively small dataset. The heterogeneity in the tested clinical tasks and used methods among our selected papers did not allow us to conduct a meta-analysis. The field of LLMs and its clinical implications is quickly evolving, and thus drawing conclusions still requires further research.

In conclusion, while incorporating LLMs in nephrology shows promise across various levels of patient care, their broad implementation is still premature. Further research is required to validate these tools in terms of accuracy, rare and critical conditions, and real-world performance.

**Contributions:**

ZU: Data collection and extraction, writing the manuscript, interpretation and visualization of the presented results.

SS: Provided critical guidance throughout, contributed to data interpretation, and thoroughly revised the manuscript.

OE: Provided critical guidance throughout, contributed to data interpretation, and thoroughly revised the manuscript.

LC: Provided critical guidance throughout, contributed to data interpretation, and thoroughly revised the manuscript.

EK: Provided critical guidance throughout, contributed to data interpretation, and thoroughly revised the manuscript.

GNN: Provided critical guidance throughout, contributed to data interpretation, and thoroughly revised the manuscript.

## References:

1. Brown TB, Mann B, Ryder N, et al. *Language Models Are Few-Shot Learners*. <https://commoncrawl.org/the-data/>
2. Sorin V, Klang E. Large language models and the emergence phenomena. *Eur J Radiol Open*. 2023;10. doi:10.1016/j.ejro.2023.100494
3. Sorin V, Barash Y, Konen E, Klang E. Large language models for oncological applications. *J Cancer Res Clin Oncol*. 2023;149(11):9505-9508. doi:10.1007/s00432-023-04824-w
4. Sorin V, Glicksberg BS, Artsi Y, et al. Utilizing large language models in breast cancer management: systematic review. *J Cancer Res Clin Oncol*. 2024;150(3). doi:10.1007/s00432-024-05678-6
5. Artsi Y, Sorin V, Konen E, Glicksberg BS, Nadkarni G, Klang E. Large language models for generating medical examinations: systematic review. *BMC Med Educ*. 2024;24(1). doi:10.1186/s12909-024-05239-y
6. Omar M, Soffer S, Charney AW, Landi I, Nadkarni GN, Klang E. Applications of large language models in psychiatry: a systematic review. *Front Psychiatry*. 2024;15. doi:10.3389/fpsy.2024.1422807
7. Mudrik A, Nadkarni GN, Efros O, Glicksberg BS, Klang E, Soffer S. Exploring the role of Large Language Models in haematology: A focused review of applications, benefits and limitations. *Br J Haematol*. Published online 2024. doi:10.1111/bjh.19738
8. Omar M, Brin D, Glicksberg B, Klang E. Utilizing natural language processing and large language models in the diagnosis and prediction of infectious diseases: A systematic review. *Am J Infect Control*. 2024;52(9):992-1001. doi:10.1016/j.ajic.2024.03.016
9. Klang E, Sourosh A, Nadkarni GN. Evaluating the role of ChatGPT in gastroenterology: a comprehensive systematic review of applications, benefits, and limitations. *Therap Adv Gastroenterol*. 2023;16. doi:10.1177/17562848231218618
10. Barash Y, Klang E, Konen E, Sorin V. ChatGPT-4 Assistance in Optimizing Emergency Department Radiology Referrals and Imaging Selection. *J Am Coll Radiol*. 2023;20(10):998-1003. doi:10.1016/j.jacr.2023.06.009
11. Glicksberg BS, Timsina P, Patel D, et al. Evaluating the accuracy of a state-of-the-art large language model for prediction of admissions from the emergency room. *Journal of the American Medical Informatics Association*. 2024;31(9):1921-1928. doi:10.1093/jamia/ocae103
12. Brin D, Sorin V, Barash Y, et al. Assessing GPT-4 multimodal performance in radiological image analysis. *Eur Radiol*. Published online 2024. doi:10.1007/s00330-024-11035-5
13. Abd-Alrazaq A, AlSaad R, Alhuwail D, et al. Large Language Models in Medical Education: Opportunities, Challenges, and Future Directions. *JMIR Med Educ*. 2023;9. doi:10.2196/48291
14. Nazi Z Al, Peng W. Large Language Models in Healthcare and Medical Domain: A Review. *Informatics*. 2024;11(3):57. doi:10.3390/informatics11030057

15. Kaftan AN, Hussain MK, Naser FH. Response accuracy of ChatGPT 3.5 Copilot and Gemini in interpreting biochemical laboratory data a pilot study. *Sci Rep*. 2024;14(1):8233. doi:10.1038/s41598-024-58964-1
16. Van MH, Verma P, Wu X. On Large Visual Language Models for Medical Imaging Analysis: An Empirical Study. Published online February 21, 2024. <http://arxiv.org/abs/2402.14162>
17. Klang E. Deep learning and medical imaging. *J Thorac Dis*. 2018;10(3):1325-1328. doi:10.21037/jtd.2018.02.76
18. Sorin V, Barash Y, Konen E, Klang E. Deep-learning natural language processing for oncological applications. *Lancet Oncol*. 2020;21(12):1553-1556. doi:10.1016/S1470-2045(20)30615-X
19. Soffer S, Ben-Cohen A, Shimon O, Amitai MM, Greenspan H, Klang E. Convolutional Neural Networks for Radiologic Images: A Radiologist's Guide. *Radiology*. 2019;290(3):590-606. doi:10.1148/radiol.2018180547
20. Vaswani A, Shazeer N, Parmar N, et al. Attention Is All You Need. Published online June 12, 2017. <http://arxiv.org/abs/1706.03762>
21. Gorenstein L, Konen E, Green M, Klang E. Bidirectional Encoder Representations from Transformers in Radiology: A Systematic Review of Natural Language Processing Applications. *J Am Coll Radiol*. 2024;21(6):914-941. doi:10.1016/j.jacr.2024.01.012
22. Gemini Team, Georgiev P, Lei VI, et al. Gemini 1.5: Unlocking multimodal understanding across millions of tokens of context. Published online March 8, 2024. <http://arxiv.org/abs/2403.05530>
23. Sheikh MS, Thongprayoon C, Qureshi F, et al. Personalized Medicine Transformed: ChatGPT's Contribution to Continuous Renal Replacement Therapy Alarm Management in Intensive Care Units. *J Pers Med*. 2024;14(3). doi:10.3390/jpm14030233
24. Miao J, Thongprayoon C, Craici IM, Cheungpasitporn W. How to improve ChatGPT performance for nephrologists: a technique guide. *J Nephrol*. Published online 2024. doi:10.1007/s40620-024-01974-z
25. Litake O, Park BH, Tully JL, Gabriel RA. Constructing synthetic datasets with generative artificial intelligence to train large language models to classify acute renal failure from clinical notes. *Journal of the American Medical Informatics Association*. 2024;31(6):1404-1410. doi:10.1093/jamia/ocae081
26. Yang T, Sucholutsky I, Jen KY, Schonlau M. exKidneyBERT: a language model for kidney transplant pathology reports and the crucial role of extended vocabularies. *PeerJ Comput Sci*. 2024;10. doi:10.7717/peerj-cs.1888
27. Miao J, Thongprayoon C, Suppadungsuk S, Krisanapan P, Radhakrishnan Y, Cheungpasitporn W. Chain of Thought Utilization in Large Language Models and Application in Nephrology. *Medicina (Kaunas)*. 2024;60(1). doi:10.3390/medicina60010148
28. Miao J, Thongprayoon C, Suppadungsuk S, Garcia Valencia OA, Cheungpasitporn W. Integrating Retrieval-Augmented Generation with Large Language Models in



- Nephrology: Advancing Practical Applications. *Medicina (Lithuania)*. 2024;60(3). doi:10.3390/medicina60030445
29. Zisser M, Aran D. Transformer-based Time-to-Event Prediction for Chronic Kidney Disease Deterioration. Published online June 9, 2023. doi:10.1093/jamia/ocae025
  30. Mao C, Yao L, Luo Y. A Pre-Trained Clinical Language Model for Acute Kidney Injury. In: *2020 IEEE International Conference on Healthcare Informatics, ICHI 2020*. Institute of Electrical and Electronics Engineers Inc.; 2020. doi:10.1109/ICHI48887.2020.9374312
  31. Berger M, Zygmanski A, Sellering F, et al. Contactless and continuous sodium concentration monitoring during continuous renal replacement therapy. *Sens Actuators B Chem*. 2020;320. doi:10.1016/j.snb.2020.128372
  32. Qarajeh A, Tangpanithandee S, Thongprayoon C, et al. AI-Powered Renal Diet Support: Performance of ChatGPT, Bard AI, and Bing Chat. 2023;13:1160-1172. doi:10.3390/clinpract
  33. Garcia Valencia OA, Thongprayoon C, Miao J, et al. Empowering inclusivity: improving readability of living kidney donation information with ChatGPT. *Front Digit Health*. 2024;6. doi:10.3389/fdgth.2024.1366967
  34. Garcia Valencia OA, Thongprayoon C, Jadlowiec CC, et al. AI-driven translations for kidney transplant equity in Hispanic populations. *Sci Rep*. 2024;14(1). doi:10.1038/s41598-024-59237-7
  35. Lee J, Park J, Han HS. Using ChatGPT for Kidney Transplantation: Perceived Information Quality by Race and Education Levels. *Clin Transplant*. 2024;38(7). doi:10.1111/ctr.15378
  36. Naz R, Akacı O, Erdoğan H, Açıkgöz A. Can large language models provide accurate and quality information to parents regarding chronic kidney diseases? *J Eval Clin Pract*. Published online 2024. doi:10.1111/jep.14084
  37. Sheikh MS, Thongprayoon C, Suppadungsuk S, et al. Evaluating ChatGPT's Accuracy in Responding to Patient Education Questions on Acute Kidney Injury and Continuous Renal Replacement Therapy. *Blood Purif*. Published online 2024. doi:10.1159/000539065
  38. Cè M, Chiarpenello V, Bubba A, et al. Exploring the Role of ChatGPT in Oncology: Providing Information and Support for Cancer Patients. *BioMedInformatics*. 2024;4(2):877-888. doi:10.3390/biomedinformatics4020049

**Figure 1: Visual Abstract**

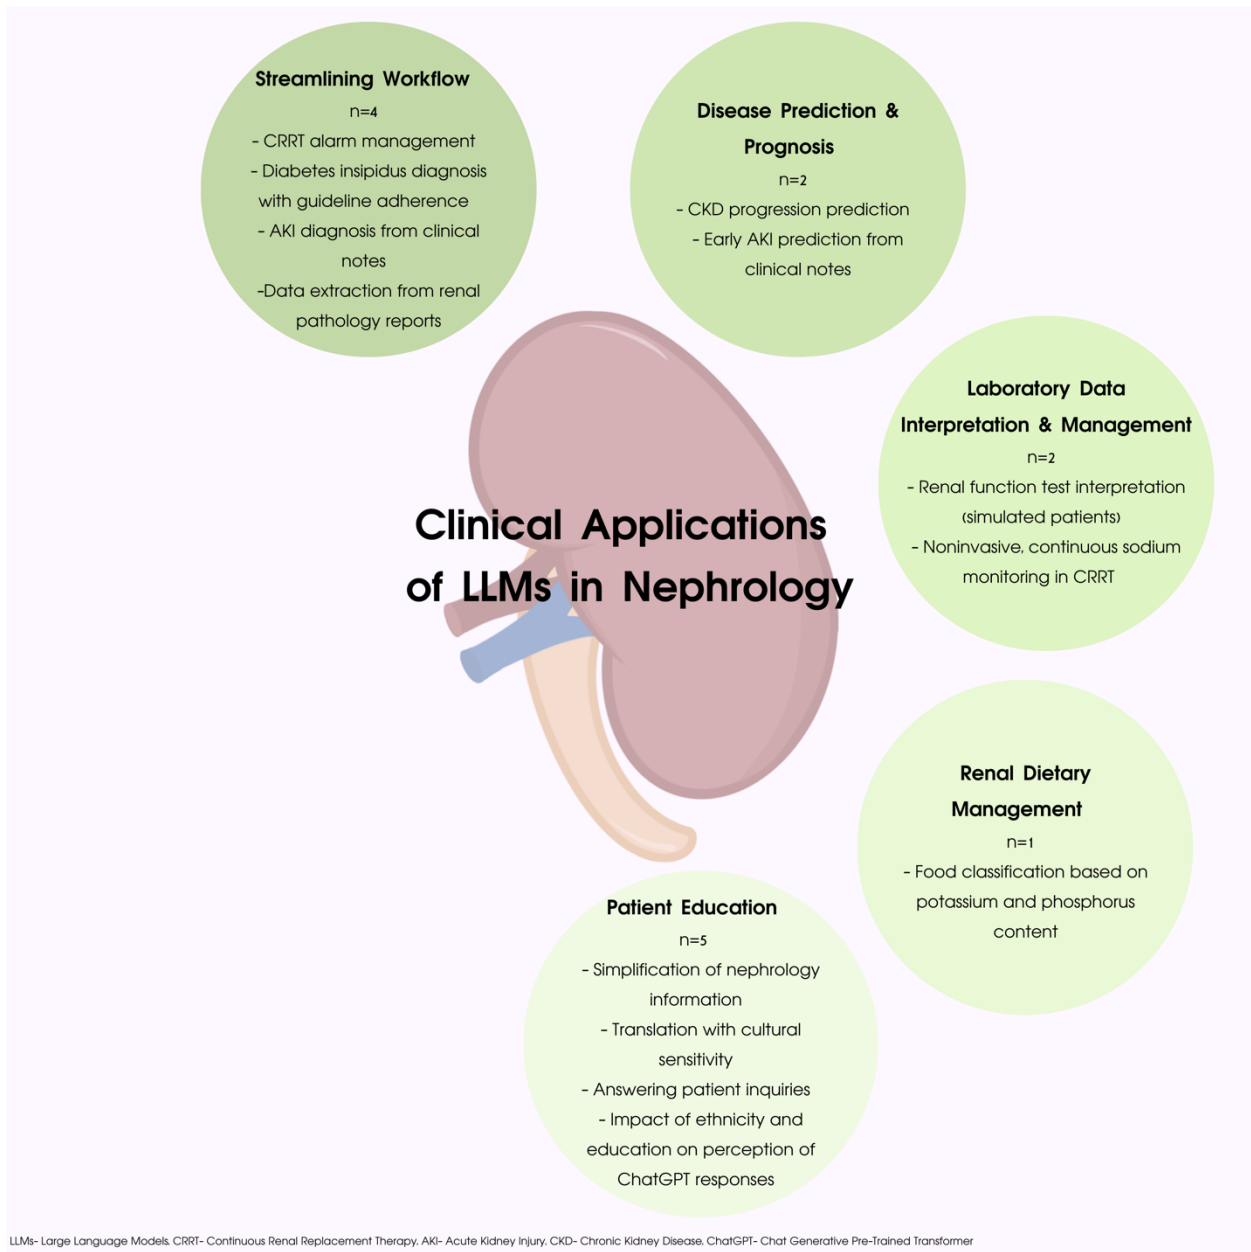

**Figure 2: Overview of AI modalities**

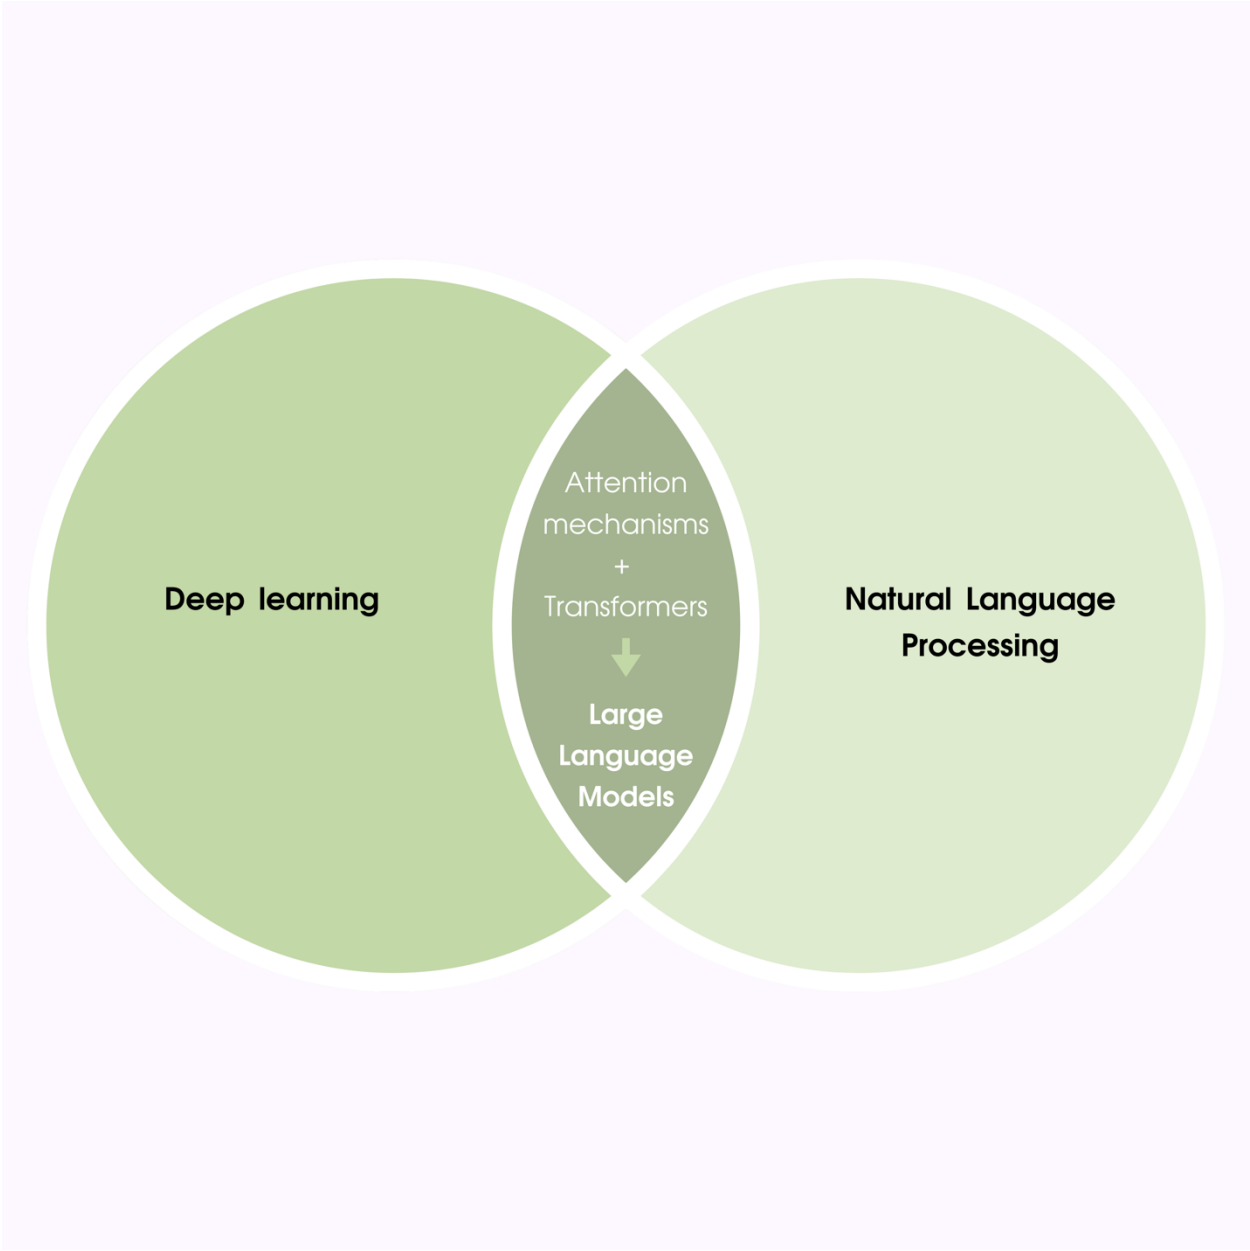

**Figure 3: Search and selection flowchart**

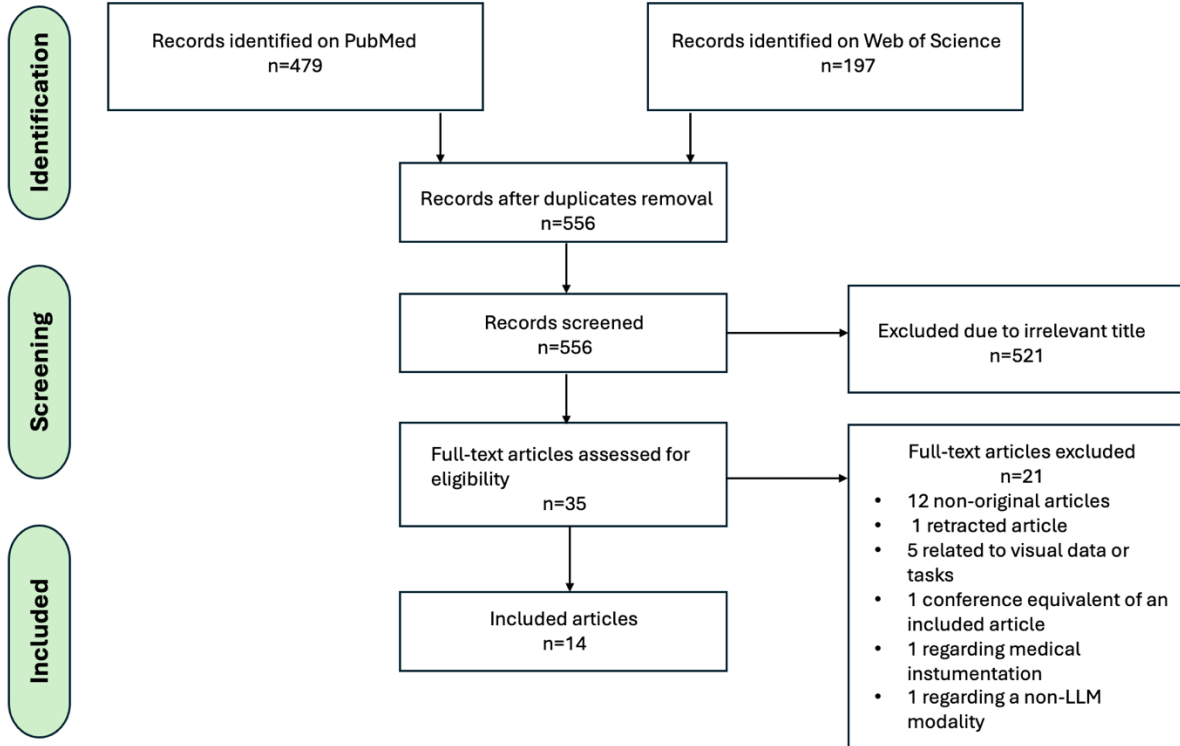

**Table 1:**

| Clinical application                          | Title                                                                                                                                                      | 1 <sup>st</sup> author           | Journal                                                                                         | Year of publication |
|-----------------------------------------------|------------------------------------------------------------------------------------------------------------------------------------------------------------|----------------------------------|-------------------------------------------------------------------------------------------------|---------------------|
| Streamlining workflow                         | Personalized Medicine Transformed: ChatGPT's Contribution to Continuous Renal Replacement Therapy Alarm Management in Intensive Care Units                 | Sheikh MS <sup>23</sup>          | J Pers Med                                                                                      | 2024                |
|                                               | How to improve ChatGPT performance for nephrologists: a technique guide                                                                                    | Miao J <sup>24</sup>             | J Nephrol                                                                                       | 2024                |
|                                               | Constructing synthetic datasets with generative artificial intelligence to train large language models to classify acute renal failure from clinical notes | Litake O <sup>25</sup>           | J Am Med Inform Assoc                                                                           | 2024                |
|                                               | exKidneyBERT: a language model for kidney transplant pathology reports and the crucial role of extended vocabularies                                       | Yang T <sup>26</sup>             | PeerJ Comput Sci                                                                                | 2024                |
| Disease prediction and prognosis              | Transformer-based time-to-event prediction for chronic kidney disease deterioration                                                                        | Zisser M <sup>29</sup>           | J Am Med Inform Assoc                                                                           | 2024                |
|                                               | A Pre-trained Clinical Language Model for Acute Kidney Injury                                                                                              | Mao CS <sup>30</sup>             | Proceedings of the 2020 8th IEEE International Conference on Healthcare Informatics (ICHI 2020) | 2020                |
| Laboratory data interpretation and management | Response accuracy of ChatGPT 3.5 Copilot and Gemini in interpreting biochemical laboratory data a pilot study                                              | Kaftan AN <sup>15</sup>          | Sci Rep                                                                                         | 2024                |
|                                               | Contactless and continuous sodium concentration monitoring during continuous renal replacement therapy                                                     | Berger M <sup>31</sup>           | Sensors and Actuators B: Chemical                                                               | 2020                |
| Renal dietary management                      | AI-Powered Renal Diet Support: Performance of ChatGPT, Bard AI, and Bing Chat                                                                              | Qarajeh A <sup>32</sup>          | Clin Pract                                                                                      | 2023                |
| Patient education                             | Empowering inclusivity: improving readability of living kidney donation information with ChatGPT                                                           | Garcia Valencia OA <sup>33</sup> | Front Digit Health                                                                              | 2024                |
|                                               | AI-driven translations for kidney transplant equity in Hispanic populations                                                                                | Garcia Valencia OA <sup>34</sup> | Sci Rep                                                                                         | 2024                |
|                                               | Using ChatGPT for Kidney Transplantation: Perceived Information Quality by Race and Education Levels                                                       | Lee J <sup>35</sup>              | Clin Transplant                                                                                 | 2024                |
|                                               | Can large language models provide accurate and quality information to                                                                                      | Naz R <sup>36</sup>              | J Eval Clin Pract                                                                               | 2024                |

|                                                                                                                                            |                         |             |      |
|--------------------------------------------------------------------------------------------------------------------------------------------|-------------------------|-------------|------|
| parents regarding chronic kidney diseases?                                                                                                 |                         |             |      |
| Evaluating ChatGPT's Accuracy in Responding to Patient Education Questions on Acute Kidney Injury and Continuous Renal Replacement Therapy | Sheikh MS <sup>37</sup> | Blood Purif | 2024 |

**Table 2:**

| Clinical application             | Ref. | Model                        | Objective                                                                           | Training sets                                                                                                             | Reference standard         | Sample size                             | Main findings                                                                          |
|----------------------------------|------|------------------------------|-------------------------------------------------------------------------------------|---------------------------------------------------------------------------------------------------------------------------|----------------------------|-----------------------------------------|----------------------------------------------------------------------------------------|
| Streamlining workflow            | 23   | ChatGPT, GPT-4               | Compare accuracy in CRRT alarm management                                           | N/A                                                                                                                       | Nephrologist answer key    | 50 CRRT alarm questions                 | GPT-4 (90%, 94% accuracy) outperformed ChatGPT (86%, 84%)                              |
|                                  | 24   | Custom GPT-4                 | Diagnose nephrogenic diabetes insipidus with CoT and RAG prompting                  | N/A                                                                                                                       | Standard prompting         | Unspecified                             | CoT provided more specificity; RAG-aligned GPT-4 with KDIGO guidelines                 |
|                                  | 25   | RoBERTa, BioBERT, PubMedBERT | Identify acute renal failure from clinical notes                                    | -Authentic MIMIC-III discharge summaries (75% train, 25% test)<br><br>-Three sets of synthetic notes generated by ChatGPT | Anesthesiologist labelling | 1000 authentic and 1000 synthetic notes | RoBERTa outperformed others (AUC 0.84). Shorter synthetic notes improved results.      |
|                                  | 26   | exKidneyBERT                 | Extract data from renal transplant pathology reports for rejection and IFTA grading | Renal transplant pathology reports with extended tokenizer                                                                | Pathological diagnosis     | 20% of 3,428 reports                    | exKidneyBERT showed highest accuracy: 83.3% and 79.2% for rejection, 95.8% for IFTA    |
| Disease prediction and prognosis | 29   | STRAFE transformer           | time-to-event prediction of CKD progression from stage 3 to 5                       | 11th Health Digital Data Sandbox dataset (80% train, 20% test)                                                            | Medical claims data        | 136,027 patients with stage 3 CKD       | STRAFE outperformed other models, improved high-risk patient PPV (from 6.67% to 20.9%) |
|                                  | 30   | AKI-BERT                     | Predict early AKI risk from clinical notes                                          | MIMIC-III dataset (train 9248, validation 2312, test 5000)                                                                | KDIGO guidelines           | 16,560 ICU notes                        | AKI-BERT had highest AUC (0.72–0.76) with targeted AKI training                        |

|                                               |    |                                    |                                                                                                                       |     |                                                            |                                                            |                                                                                                                                                                                |
|-----------------------------------------------|----|------------------------------------|-----------------------------------------------------------------------------------------------------------------------|-----|------------------------------------------------------------|------------------------------------------------------------|--------------------------------------------------------------------------------------------------------------------------------------------------------------------------------|
| Laboratory data interpretation and management | 15 | ChatGPT, Copilot, Gemini           | Interpret renal function test results along with other lab data                                                       | N/A | Independent physician ratings                              | 10 simulated lab sets                                      | Copilot had the highest accuracy (median: 5), significantly outperforming other models ( $p < 0.01$ )                                                                          |
|                                               | 31 | Differential transformer           | Contactless sodium monitoring during simulated CRRT on human pRBCs, focusing on performance in electrolyte imbalances | N/A | Blood sample analysis by BGA                               | 6 hours of sodium measurement                              | High precision (0.3 mmol/L) and sensitivity (192 mV/mol/L), lower absolute accuracy (4 mmol/L)                                                                                 |
| Renal dietary management                      | 32 | ChatGPT, GPT-4, Bard AI, Bing Chat | Classify food items based on potassium and phosphorus content                                                         | N/A | Mayo Clinic Renal Diet Handbook                            | 240 food items selected                                    | GPT-4 and Bing Chat were most accurate for potassium (81%), Bard AI for phosphorus (100%)                                                                                      |
| Patient education                             | 33 | ChatGPT, GPT-4                     | Simplify FAQs on kidney donation                                                                                      | N/A | Donate Life America website                                | 27 FAQs                                                    | GPT-4 reduced readability to $4.30 \pm 1.71$ , outperforming other models, with 96.3% success vs. ChatGPT's 59.26%                                                             |
|                                               | 34 | ChatGPT, GPT-4                     | Translate kidney transplant FAQs into Spanish                                                                         | N/A | Spanish-speaking nephrologist ratings                      | 54 FAQs on kidney transplant (sources: OPTN, NHS, and NKF) | Both models had high accuracy (ChatGPT: $4.89 \pm 0.31$ , GPT-4: $4.94 \pm 0.23$ ) and cultural sensitivity ( $4.96 \pm 0.19$ ), with no significant difference ( $p > 0.05$ ) |
|                                               | 35 | ChatGPT                            | Answered kidney transplant questions, the responses were evaluated in an online survey                                | N/A | 565 individuals                                            | 86 questions based on 4624 Reddit posts                    | Higher education levels predicted higher perceived quality in non-White individuals ( $M = 6.03$ , $SE = 0.39$ ), comparing to White individuals ( $M = 5.85$ , $SE = 0.39$ )  |
|                                               | 36 | ChatGPT, Gemini, Copilot           | Answer CKD FAQs                                                                                                       | N/A | Pediatric nephrologist ratings (based on KDIGO guidelines) | 40 FAQs (online sources unspecified)                       | Gemini provided the most accurate CKD information (GQS $3.46 \pm 0.55$ ) compared to other models                                                                              |

|                                                                                                                                                                                                                                                                                                                                                                                                                                                                                                                                                                                                                                                                                                                                                                                                                      |       |                                                               |     |                                       |                                                                |                                                                                                    |
|----------------------------------------------------------------------------------------------------------------------------------------------------------------------------------------------------------------------------------------------------------------------------------------------------------------------------------------------------------------------------------------------------------------------------------------------------------------------------------------------------------------------------------------------------------------------------------------------------------------------------------------------------------------------------------------------------------------------------------------------------------------------------------------------------------------------|-------|---------------------------------------------------------------|-----|---------------------------------------|----------------------------------------------------------------|----------------------------------------------------------------------------------------------------|
| 37                                                                                                                                                                                                                                                                                                                                                                                                                                                                                                                                                                                                                                                                                                                                                                                                                   | GPT-4 | Answered AKI and CRRT questions in various linguistic formats | N/A | Critical care nephrologist evaluation | 89 questions from Mayo Clinic Handbook (50 on CRRT, 39 on AKI) | 98% accuracy for CRRT questions with misspellings/incomplete sentences, 97% for all formats on AKI |
| <p>GPT: generative pretrained transformer, CRRT: continuous renal replacement therapy, N/A: not applicable, CoT: chain-of-thought, RAG: retrieval-augmented generation, KDIGO: Kidney Disease Improving Global Outcomes, BERT: Bidirectional Encoder Representations from Transformers, MIMIC-III: Medical Information Mart for Intensive Care-III, AUC: area under curve, IFTA: interstitial fibrosis and tubular atrophy, CKD: chronic kidney disease, PPV: positive predictive value, AKI: acute kidney injury, ICU: intensive care unit, pRBC: packed red blood cells, BGA: blood gas analyzer, FAQs: frequently asked questions, OPTN= Organ Procurement and Transplantation Network, NHS: National Health Service, NKF= National Kidney Foundation, M: Mean, SE: Standard Error, GQS: global quality score</p> |       |                                                               |     |                                       |                                                                |                                                                                                    |

**Table 3:**

| Clinical application  | Ref. | Advantages of LLMs                                                                                                                                                                                                                                                                                                                                                       | Limitations of LLMs                                                                                                                                                                                                                                                                                                                                                                                                                                                                                                                                                                         |
|-----------------------|------|--------------------------------------------------------------------------------------------------------------------------------------------------------------------------------------------------------------------------------------------------------------------------------------------------------------------------------------------------------------------------|---------------------------------------------------------------------------------------------------------------------------------------------------------------------------------------------------------------------------------------------------------------------------------------------------------------------------------------------------------------------------------------------------------------------------------------------------------------------------------------------------------------------------------------------------------------------------------------------|
| Streamlining workflow | 23   | <ul style="list-style-type: none"> <li>-High accuracy in interpreting CRRT alarms.</li> <li>-High consistency.</li> <li>-GPT-4 outperformed ChatGPT.</li> <li>-Potential to reduce ICU alarm fatigue.</li> <li>-Applicable in real-life ICU scenarios.</li> <li>-GPT-4 can potentially solve newly encountered alarms.</li> </ul>                                        | <ul style="list-style-type: none"> <li>-Human verification still required.</li> <li>-Findings are specific to CRRT; not yet applicable to other critical care devices.</li> <li>-Further training needed for broader clinical scenarios (including rare conditions).</li> <li>-Potential for bias and data quality issues.</li> <li>-Cannot fully replicate clinicians' complex decision-making.</li> <li>-Lack of real-time integration with CRRT limits fast intervention in ICU settings.</li> <li>-Empirical validation needed to bridge experimental results with practice.</li> </ul> |
|                       | 24   | <ul style="list-style-type: none"> <li>-CoT enables more specific diagnoses and mimics physician reasoning, especially for multi-step or rare conditions.</li> <li>-RAG accesses external literature and guidelines to support evidence-based medicine.</li> <li>-Customizable profiles for nephrologists.</li> </ul>                                                    | <ul style="list-style-type: none"> <li>-CoT and RAG require complex prompt engineering and manual updates.</li> <li>-Only GPT-4 was evaluated.</li> <li>-Effectiveness limited by training data.</li> <li>-Ethical and legal concerns: constant verification needed to detect bias or hallucinations.</li> <li>-Further enhancements needed for generalizability.</li> </ul>                                                                                                                                                                                                                |
|                       | 25   | <ul style="list-style-type: none"> <li>-Effective at processing clinical notes and identifying nephrology conditions.</li> <li>- RoBERTa performed best due to larger datasets and focus on masked language modeling.</li> <li>-Balanced datasets and synthetic data (from LLaMA-2) were used, which may help reduce bias and improve model generalizability.</li> </ul> | <ul style="list-style-type: none"> <li>-Limited generalizability of BioBERT and PubMedBERT in broader contexts.</li> <li>-ARF focus limits application to other nephrology conditions.</li> <li>-Retrospective design may introduce bias; prospective validation needed.</li> <li>-Longer clinical notes reduce effectiveness.</li> <li>-Absence of RAG for enhancing performance.</li> </ul>                                                                                                                                                                                               |



|                                               |    |                                                                                                                                                                                                                                                                                                                                                                                                                                                                                                                                          |                                                                                                                                                                                                                                                                                                                                                                                                                                     |
|-----------------------------------------------|----|------------------------------------------------------------------------------------------------------------------------------------------------------------------------------------------------------------------------------------------------------------------------------------------------------------------------------------------------------------------------------------------------------------------------------------------------------------------------------------------------------------------------------------------|-------------------------------------------------------------------------------------------------------------------------------------------------------------------------------------------------------------------------------------------------------------------------------------------------------------------------------------------------------------------------------------------------------------------------------------|
|                                               |    | <ul style="list-style-type: none"> <li>-Improved model performance with shorter prompts.</li> <li>- RoBERTa's potential generalizability from parameter sharing and extensive training.</li> <li>-No need for protected clinical data or manual labeling in data-scarce environments.</li> </ul>                                                                                                                                                                                                                                         |                                                                                                                                                                                                                                                                                                                                                                                                                                     |
|                                               | 26 | <ul style="list-style-type: none"> <li>-Extended vocabulary of medical terms improves renal transplant pathology report processing.</li> <li>-exKidneyBERT outperformed other models in data extraction.</li> <li>-High accuracy in classifying rejection types and IFTA, despite a small training dataset.</li> <li>-Adaptability to medical subdomains where large, annotated datasets may not be available.</li> <li>-Improved positive predictive value in identifying high-risk conditions from renal pathology reports.</li> </ul> | <ul style="list-style-type: none"> <li>-Limited broader applicability; potential overfitting to tested tasks.</li> <li>-Relatively small training dataset.</li> <li>-The effectiveness of exKidneyBERT relies on extending the vocabulary with specific keywords.</li> <li>-Dependence on manual annotation for training</li> <li>-Maintaining patient confidentiality can complicate data access and model development.</li> </ul> |
| Disease prediction and prognosis              | 29 | <ul style="list-style-type: none"> <li>-Time-to-event predictions are more clinically relevant than fixed-time risk predictions.</li> <li>-STRAFE outperformed other models in both time-to-event and fixed-time predictions.</li> <li>-Use of real-world censored data improves accuracy.</li> <li>-Availability of data and code, as well as the used attention mechanism, allows reproducibility.</li> <li>-Novel visualization approach aids physician understanding.</li> </ul>                                                     | <ul style="list-style-type: none"> <li>-Complex training process.</li> <li>-Domain experts needed for interpretation.</li> <li>-STRAFE did not improve survival time rankings.</li> <li>-Further research is needed to generalize the model across demographics and other prediction tasks.</li> <li>-Potential bias in evaluation.</li> </ul>                                                                                      |
|                                               | 30 | <ul style="list-style-type: none"> <li>-Domain-specific BERT improves performance.</li> <li>-AKI-BERT handles unstructured text.</li> <li>-The detailed data preparation, pre-training and fine-tuning of AKI-BERT ensure reproducibility.</li> <li>-Addressed data imbalance.</li> </ul>                                                                                                                                                                                                                                                | <ul style="list-style-type: none"> <li>-Extensive training required.</li> <li>-Further adaptation needed for tasks beyond AKI prediction.</li> <li>-BERT's 512-token input limit necessitates truncation and pooling for long notes.</li> <li>-Dependency on data quality.</li> <li>-Bias remains despite efforts to address imbalance.</li> </ul>                                                                                  |
| Laboratory data interpretation and management | 15 | <ul style="list-style-type: none"> <li>-No ethical concerns with simulated patient data.</li> <li>-Copilot outperformed other models.</li> <li>-Copilot provided detailed responses.</li> <li>-Statistical analysis suited for nephrology.</li> </ul>                                                                                                                                                                                                                                                                                    | <ul style="list-style-type: none"> <li>-GPT-4 not evaluated.</li> <li>-Variable response lengths.</li> <li>-Copilot relies on online sources, limiting its use for complex medical data.</li> <li>-Limited evaluation of 10 simulated patients.</li> <li>-Further training and validation needed.</li> <li>-Subjective rating of responses.</li> </ul>                                                                              |

|                          |    |                                                                                                                                                                                                                                                                                                                                                                                                                       |                                                                                                                                                                                                                                                                                                                                                                                         |
|--------------------------|----|-----------------------------------------------------------------------------------------------------------------------------------------------------------------------------------------------------------------------------------------------------------------------------------------------------------------------------------------------------------------------------------------------------------------------|-----------------------------------------------------------------------------------------------------------------------------------------------------------------------------------------------------------------------------------------------------------------------------------------------------------------------------------------------------------------------------------------|
|                          |    |                                                                                                                                                                                                                                                                                                                                                                                                                       | <ul style="list-style-type: none"> <li>-Lack of individualization.</li> <li>-Fluidity in accuracy over time.</li> </ul>                                                                                                                                                                                                                                                                 |
|                          | 31 | <ul style="list-style-type: none"> <li>-Continuous noninvasive monitoring.</li> <li>-High sensitivity and precision.</li> <li>-Evaluated at different pathological concentrations of electrolytes and for potential cross-sensitivity.</li> </ul>                                                                                                                                                                     | <ul style="list-style-type: none"> <li>-Lower absolute accuracy than standard BGA.</li> <li>-Complex setup and calibration required.</li> <li>-Potential cross-sensitivity with other electrolytes.</li> <li>-Limited testing (6 hours).</li> <li>-Needs real-world validation.</li> </ul>                                                                                              |
| Renal dietary management | 32 | <ul style="list-style-type: none"> <li>-High accuracy in classifying potassium and phosphorus content.</li> <li>-High consistency.</li> <li>-Potential to reduce healthcare workload through automation.</li> <li>-GPT-4 shows advancements over ChatGPT.</li> <li>-Can assess various dietary items.</li> </ul>                                                                                                      | <ul style="list-style-type: none"> <li>-Inconsistency in results remains, inconsistent phosphorus classification.</li> <li>-Clinical validation needed to avoid misinformation and patient harm.</li> <li>-Recommendation accuracy depends on input quality.</li> <li>-Lack of personalized dietary recommendations.</li> <li>-Ethical/ legal concerns with clinical AI use.</li> </ul> |
| Patient education        | 33 | <ul style="list-style-type: none"> <li>-Promotes equity, reducing healthcare disparities.</li> <li>-Utilizes online content patients can access.</li> <li>-Accuracy and fidelity confirmed.</li> <li>-Two independent sessions in new chats were conducted to assess reproducibility.</li> <li>-GPT-4 simplifies information well.</li> <li>-ChatGPT also improves accessibility for broader demographics.</li> </ul> | <ul style="list-style-type: none"> <li>-ChatGPT (free) less consistent than GPT-4 (paid).</li> <li>-Limited to kidney donation FAQs.</li> <li>-Potential for regression in readability with updates.</li> <li>-Flesch-Kincaid formula may miss readability complexities.</li> </ul>                                                                                                     |
|                          | 34 | <ul style="list-style-type: none"> <li>-Promotes health equity, addressing language barriers.</li> <li>-High cultural sensitivity and accuracy.</li> <li>-No significant differences between ChatGPT versions.</li> <li>-Uses FAQs from reputable sources.</li> <li>-High inter-rater reliability (Cohen's kappa = 0.85).</li> </ul>                                                                                  | <ul style="list-style-type: none"> <li>-Subjective scoring system.</li> <li>-Limited to Spanish translation; further evaluations needed for other languages (and other medical areas).</li> <li>-Only two LLMs tested.</li> <li>-Occasional lower translation scores.</li> </ul>                                                                                                        |
|                          | 35 | <ul style="list-style-type: none"> <li>-Reflects real-world concerns about kidney transplants from Reddit.</li> <li>-High perceived quality and empathy.</li> </ul>                                                                                                                                                                                                                                                   | <ul style="list-style-type: none"> <li>-Subjective scoring by non-professionals.</li> <li>-Only ChatGPT evaluated; version unspecified.</li> <li>-Perception varies by race and education.</li> <li>-Limited generalizability beyond kidney transplant.</li> </ul>                                                                                                                      |
|                          | 36 | <ul style="list-style-type: none"> <li>-High accuracy and precision for ChatGPT and Gemini.</li> <li>-Strong recall performance across modalities.</li> </ul>                                                                                                                                                                                                                                                         | <ul style="list-style-type: none"> <li>-Moderate quality for Gemini.</li> <li>-Performance varies between models and question types.</li> <li>-Inadequate compared to reference; potential misinformation.</li> <li>-Study limited to CKD questions.</li> <li>-Question sources not noted.</li> </ul>                                                                                   |

|                                                                                                                                                                                                                                                                                                                                                                                                                                                                                                       |                                                                                                                                                                                                                                                                                                                                                                                                                                                                                                         |                                                                                                                                                                                                                                             |
|-------------------------------------------------------------------------------------------------------------------------------------------------------------------------------------------------------------------------------------------------------------------------------------------------------------------------------------------------------------------------------------------------------------------------------------------------------------------------------------------------------|---------------------------------------------------------------------------------------------------------------------------------------------------------------------------------------------------------------------------------------------------------------------------------------------------------------------------------------------------------------------------------------------------------------------------------------------------------------------------------------------------------|---------------------------------------------------------------------------------------------------------------------------------------------------------------------------------------------------------------------------------------------|
|                                                                                                                                                                                                                                                                                                                                                                                                                                                                                                       | <p>37</p> <ul style="list-style-type: none"> <li>-High accuracy from GPT-4 across different formats, including misspellings and incomplete sentences.</li> <li>-Consistent across CRRT and AKI topics.</li> <li>-Reliable for patient education.</li> <li>-High reliability (Cronbach's alpha= 0.94); each question was tested in a new chat session to prevent model adaptation.</li> <li>-Capable of providing accessible medical information to individuals with varying literacy levels.</li> </ul> | <ul style="list-style-type: none"> <li>-Free version of ChatGPT not evaluated.</li> <li>-Limited to nephrology topics.</li> <li>-Cannot replace doctor-patient interactions; further research needed for real-world application.</li> </ul> |
| <p>CRRT: continuous renal replacement therapy, GPT: generative pretrained transformer, ICU: intensive care unit, CoT: chain-of-thought, RAG: retrieval-augmented generation, BERT: Bidirectional Encoder Representations from Transformers, ARF: acute renal failure, IFTA: Interstitial Fibrosis and Tubular Atrophy, AKI: acute kidney injury, BGA: blood gas analyzer, AI: artificial intelligence, FAQs: frequently asked questions, LLMs: large language models, CKD: chronic kidney disease</p> |                                                                                                                                                                                                                                                                                                                                                                                                                                                                                                         |                                                                                                                                                                                                                                             |
